# Supplementary material for: Associations Between Hair Heavy Metal Concentrations and Frailty in Mexican Adults: a Cross-Sectional Study
Source: Research Square preprint supplement (doi:10.21203/rs.3.rs-10010697/v1), 2026-06-15
Supplement: Supplementary file 1 [file cad9fa71717c35fab5062d71.docx]

Figure 1. Sample flow chart


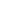


## Table 1. Distribution of log-transformed heavy-metal concentrations in hair.

| Metal (log-transformed) | N | Mean (SD), log-μg/g | Range (log-μg/g) |
| --- | --- | --- | --- |
| Mercury (Hg) | 2237 | -1.89 (1.29) | -5.12 to 6.47 |
| Titanium (Ti) | 2565 | 1.21 (0.82) | -3.52 to 5.95 |
| Vanadium (V) | 2056 | -2.03 (0.92) | -4.59 to 2.93 |
| Chromium (Cr) | 2426 | -1.51 (0.93) | -3.56 to 3.12 |
| Manganese (Mn) | 2505 | -0.12 (1.14) | -3.52 to 4.26 |
| Cobalt (Co) | 1455 | -3.54 (1.07) | -5.71 to 2.17 |
| Nickel (Ni) | 2482 | -0.47 (1.01) | -3.17 to 4.13 |
| Copper (Cu) | 2564 | 2.12 (0.78) | -4.12 to 6.06 |
| Arsenic (As) | 642 | -2.97 (0.88) | -4.34 to 1.61 |
| Molybdenum (Mo) | 1509 | -2.86 (0.88) | -5.10 to 2.17 |
| Silver (Ag) | 1771 | -2.46 (1.52) | -5.81 to 5.45 |
| Cadmium (Cd) | 1154 | -3.15 (1.14) | -5.12 to 2.54 |
| Lead (Pb) | 2545 | -0.36 (1.18) | -4.26 to 8.36 |

## 
